# Supplementary material for: Structural and functional insight into serine hydroxymethyltransferase from Helicobacter pylori
Source: PubMed Central journal article supplement (PMC6294363; doi:10.1371/journal.pone.0208850), 2018-12-14
Supplement: pone.0208850.s002.pdf [file pone.0208850.s002.pdf]

## S2 Fig

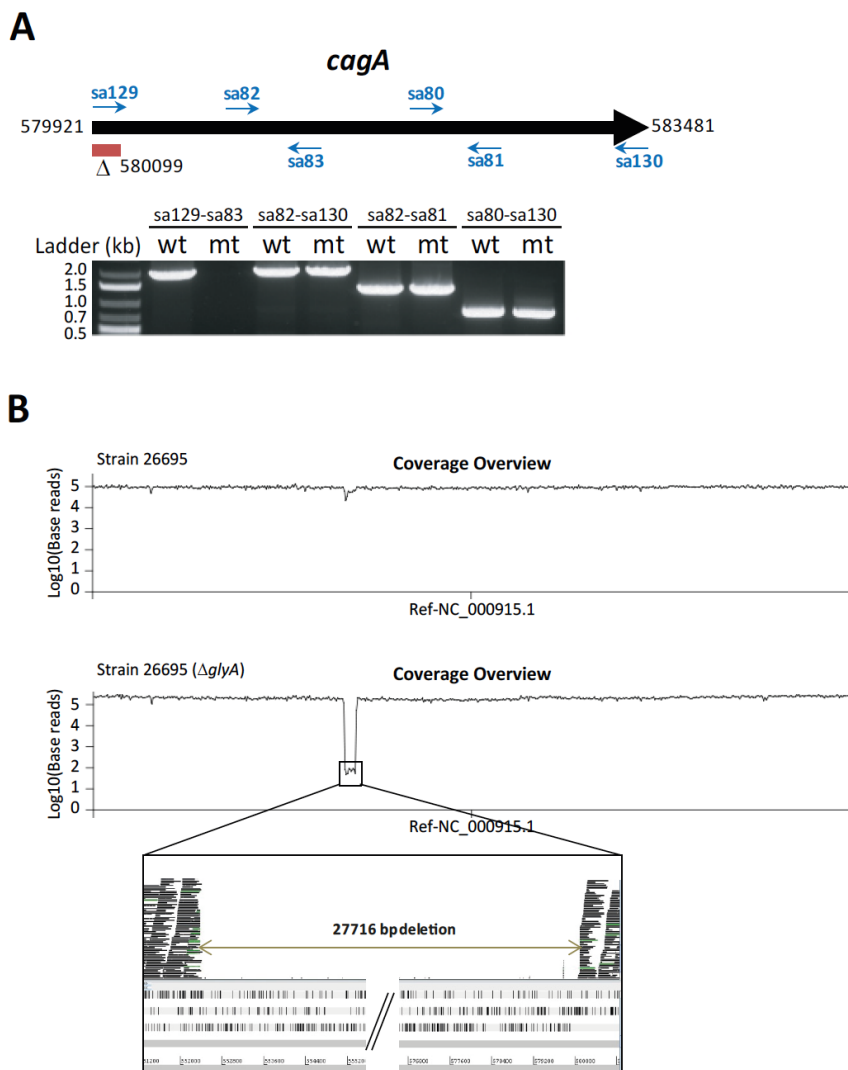

**S2 Fig. Loss of 77% of *cagPAI* in *H. pylori*  $\Delta glyA$ .** (A) PCR amplification of *cagA* internal regions with different sets of primers. Oligonucleotides are represented by blue arrows. The red box corresponds to the 178 bp sequence deleted at the 5' extremity of the *cagA* coding sequence in the *Hp* $\Delta glyA$  mutant. The numbers, flanking the black arrow representing the *cagA* gene and the red box, correspond to the genomic coordinates in *H. pylori* 26695 (NC\_000915.1). Wt: wild type and mt:  $\Delta glyA$  mutant. (B) Artemis genome browser screenshots illustrating the coverage overview of the 26995 wild type and  $\Delta glyA$  mutant genomes sequenced on an Ion Torrent PGM. The inset shows the 27,716 bp deletion into the *cag*-PAI in the  $\Delta glyA$  mutant (coordinates: 552,383 - 580,099). The extremities of the gap are located at 80 bp from the 5' extremity of the *cag5* gene (HP0524) (left end) and at 178 bp from the 5' extremity of the *cagA* gene (HP0547) (right end).
