# Supplementary material for: Structural and functional insight into serine hydroxymethyltransferase from Helicobacter pylori
Source: PubMed Central journal article supplement (PMC6294363; doi:10.1371/journal.pone.0208850), 2018-12-14
Supplement: pone.0208850.s003.pdf [file pone.0208850.s003.pdf]

**S1 Table. Coverage analysis reports using the *H. pylori* 26695 genome (NC\_000915.1) as reference.**

| <b>Characteristics</b>                    | <b>Sample</b>    |                                      |
|-------------------------------------------|------------------|--------------------------------------|
|                                           | <b>Wild type</b> | <b><i>H. pylori</i>_Δ<i>glyA</i></b> |
| <b><u>Number of mapped reads</u></b>      | 219317           | 476251                               |
| <b><u>Percent reads on target</u></b>     | 100.00%          | 100.00%                              |
| <b><u>Number of contigs</u></b>           | 1                | 1                                    |
| <b><u>Average base coverage depth</u></b> | 32.06            | 76.78                                |
| <b><u>Total base reads on target</u></b>  | 53469632         | 128064498                            |
| <b><u>Uniformity of base coverage</u></b> | 99.72%           | 98.05%                               |
