# Supplementary material for: Structural and functional insight into serine hydroxymethyltransferase from Helicobacter pylori
Source: PubMed Central journal article supplement (PMC6294363; doi:10.1371/journal.pone.0208850), 2018-12-14
Supplement: pone.0208850.s004.pdf [file pone.0208850.s004.pdf]

**S2 Table. List of peptides identified by mass spectrometry and attributed to the virulence factor CagA.**

| Start | End | Peptide Sequence                              | Start | End  | Peptide Sequence                         |
|-------|-----|-----------------------------------------------|-------|------|------------------------------------------|
| 37    | 57  | (K) <u>V</u> DNVVASFDPDQKPIVDKNDR(D)          | 500   | 12   | (K)HDGVMFVDYSNFK(Y)                      |
| 61    | 70  | (R) <u>Q</u> AFDGISQLR(E)                     | 523   | 539  | (K) <u>G</u> VGATNGVSHLEAGFNK(V)         |
| 61    | 76  | (R) <u>Q</u> AFDGISQLREEYSNK(A)               | 540   | 558  | (K) <u>V</u> AVFNLPDLNNLAITSFVR(R)       |
| 85    | 94  | (K) <u>N</u> QYFSDFIDK(S)                     | 651   | 666  | (K) <u>A</u> QANSQKDEIFALINK(E)          |
| 95    | 112 | (K) <u>S</u> NDLINKDNLIDVESSTK(S)             | 674   | 682  | (R) <u>A</u> IAYTQNLK(G)                 |
| 145   | 161 | (R) <u>N</u> FMENIQQPPIPDDKEK(A)              | 705   | 710  | (K) <u>S</u> FDEFK(N)                    |
| 170   | 182 | (K) <u>Q</u> SFAGIIGNQIR(T)                   | 744   | 755  | (K) <u>V</u> ENLNAALNEFK(N)              |
| 187   | 196 | (K) <u>F</u> MGVFDESLEK(E)                    | 770   | 784  | (K) <u>S</u> DLENSVKDVIINQK(V)           |
| 231   | 260 | (K) <u>E</u> AINQEPVPHVQPDIAATTTDIQGLPPEAR(D) | 838   | 846  | (K) <u>N</u> SELYQSVK(N)                 |
| 261   | 266 | (R) <u>D</u> LLDER(G)                         | 881   | 892  | (K) <u>F</u> KNFNNNNGLK(N)               |
| 344   | 359 | (K) <u>D</u> QQGNNVATLINVHMK(N)               | 907   | 923  | (K) <u>T</u> GQVASPEEPIYTQVAK(K)         |
| 372   | 382 | (K) <u>G</u> INNPFSFYLYK(E)                   | 929   | 951  | (K) <u>I</u> DRLNQIASGLGGVQAAGFPLK(R)    |
| 372   | 391 | (K) <u>G</u> INNPFSFYLYKEDQLTGSQR(A)          | 932   | 952  | (R) <u>L</u> NQIASGLGGVQAAGFPLKR(H)      |
| 383   | 391 | (K) <u>E</u> DQLTGSQR(A)                      | 962   | 985  | (K) <u>V</u> GLSASPEPIYATIDDLGGPFPLK(R)  |
| 392   | 399 | (R) <u>A</u> LSQEEIR(N)                       | 962   | 986  | (K) <u>V</u> GLSASPEPIYATIDDLGGPFPLKR(H) |
| 424   | 435 | (K) <u>E</u> KFQNEIEDFQK(D)                   | 1020  | 1032 | (K) <u>A</u> GFFGNLEQTIDK(L)             |
| 426   | 435 | (K) <u>F</u> QNEIEDFQK(D)                     | 1020  | 1034 | (K) <u>A</u> GFFGNLEQTIDK(L)(D)          |
| 426   | 438 | (K) <u>F</u> QNEIEDFQKDSK(A)                  | 1060  | 1070 | (K) <u>L</u> DNYAINSHTR(I)               |
| 439   | 448 | (K) <u>A</u> YLDALGNDR(I)                     | 1103  | 1118 | (K) <u>I</u> VAHNVGSVLSLEYDK(I)          |
| 459   | 476 | (K) <u>H</u> SALITEFNNGDLSYTLK(D)             |       |      |                                          |
